# Supplementary material
Source: Royal Society of Chemistry journal article supplement (doi:10.1039/d5re00384a)
Supplement: d5re00384a1.pdf [file d5re00384a1.pdf]

## Supplementary

**Table S1: BET analysis of 0.5wt%Ag**

| Catalysts                              | Calcination temperature (°C) | BET Surface area (m <sup>2</sup> /g) | Pore Volume (cm <sup>3</sup> /g) | Nanoparticle size (nm) |
|----------------------------------------|------------------------------|--------------------------------------|----------------------------------|------------------------|
| 0.5%Ag <sub>2</sub> O/TiO <sub>2</sub> | 300                          | 209                                  | 0.52                             | 28.68                  |
| 0.5%Ag <sub>2</sub> O/TiO <sub>2</sub> | 400                          | 129                                  | 0.27                             | 46.66                  |
| 0.5%Ag <sub>2</sub> O/TiO <sub>2</sub> | 450                          | 199                                  | 0.43                             | 30.21                  |
| 0.5%Ag <sub>2</sub> O/TiO <sub>2</sub> | 500                          | 95                                   | 0.29                             | 62.85                  |
| 0.5%Ag <sub>2</sub> O/TiO <sub>2</sub> | 600                          | 29                                   | 0.10                             | 205.54                 |

Fig S1 shows the XRD patterns for the 0.5wt%Ag<sub>2</sub>O/TiO<sub>2</sub> samples with varying calcination temperatures. All samples clearly show the characteristic planes of anatase phase at a series of strong peaks at  $2\theta = 25.3^\circ$  (101),  $37.8^\circ$  (004),  $48.0^\circ$  (200),  $62.6^\circ$  (204) (JCPSD, No.21-1272) [1-3]. At 600°C, a rutile phase is observed which suggest strong crystallinity with increasing calcination temperature. Furthermore, no visible metal phase was shown from the XRD patterns, which indicates that Ag is highly dispersed uniformly on TiO<sub>2</sub>. This could be attributed to low amount of Ag dopants or high dispersion in the samples [4].

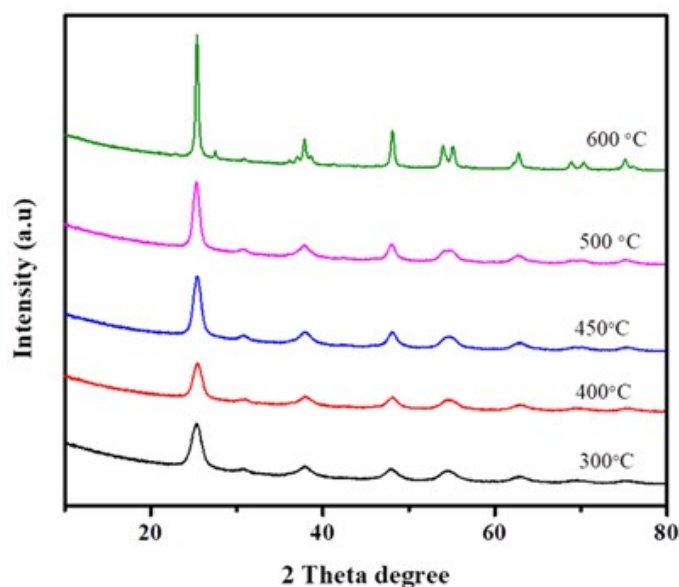

Figure S1. X-Ray Diffraction patterns of 0.5%Ag<sub>2</sub>O/TiO<sub>2</sub> sample calcined under varying calcination temperatures.

## References

1. Wang, C., et al., *Improved hydrogen production from glycerol photoreforming over sol-gel derived TiO<sub>2</sub> coupled with metal oxides*. Chemical Engineering Journal, 2017. **317**: p. 522-532.
2. Lalitha, K., et al., *Highly stabilized and finely dispersed Cu<sub>2</sub>O/TiO<sub>2</sub>: a promising visible sensitive photocatalyst for continuous production of hydrogen from glycerol: water mixtures*. The Journal of Physical Chemistry C, 2010. **114**(50): p. 22181-22189.
3. Sadanandam, G., et al., *Cobalt doped TiO<sub>2</sub>: A stable and efficient photocatalyst for continuous hydrogen production from glycerol: Water mixtures under solar light irradiation*. international journal of hydrogen energy, 2013. **38**(23): p. 9655-9664.
4. Li, Y., et al., *Effect of doping TiO<sub>2</sub> with alkaline-earth metal ions on its photocatalytic*
